# Supplementary material for: 3D hierarchical Cu@Ag nanostructure as a current collector for dendrite-free lithium metal anode
Source: Royal Society of Chemistry journal article supplement (doi:10.1039/d2dt02937e), 2022-01-01
Supplement: d2dt02937e1.pdf [file d2dt02937e1.pdf]

## Supporting Information

### **3D hierarchical Cu@Ag nanostructure as a current collector for dendrite-free lithium metal anode**

Liyuan Zhang, Qi Jin, Kaixin Zhao, Xitian Zhang\*, LiLi Wu\*

*Key Laboratory for Photonic and Electronic Bandgap Materials, Ministry of  
Education, School of Physics and Electronic Engineering, Harbin Normal University,  
Harbin 150025, PR China*

\*Corresponding author: [xtzhangzhang@hotmail.com](mailto:xtzhangzhang@hotmail.com) and [wll790107@hotmail.com](mailto:wll790107@hotmail.com)

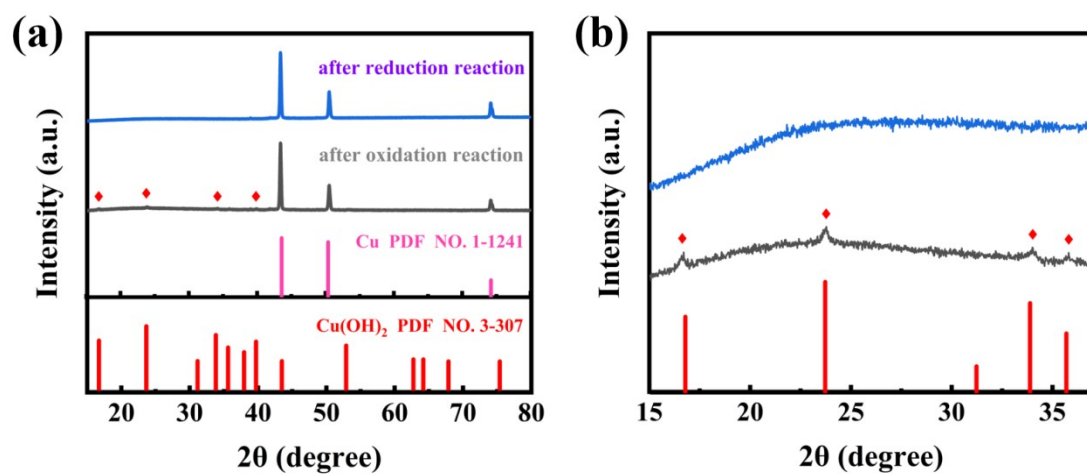

**Figure S1.** (a) XRD patterns of Cu foam after oxidation reaction and reduction reaction and (b) corresponding enlarged patterns.

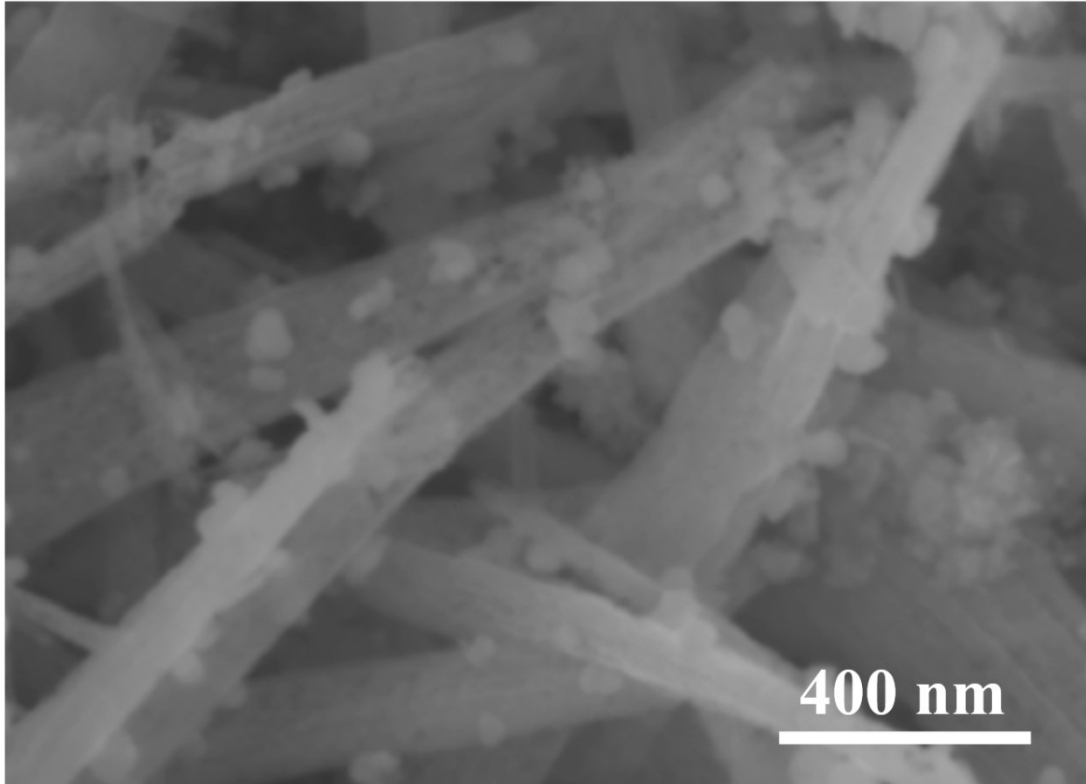

**Figure S2.** SEM image of Ag nanoparticles on Cu nanowires

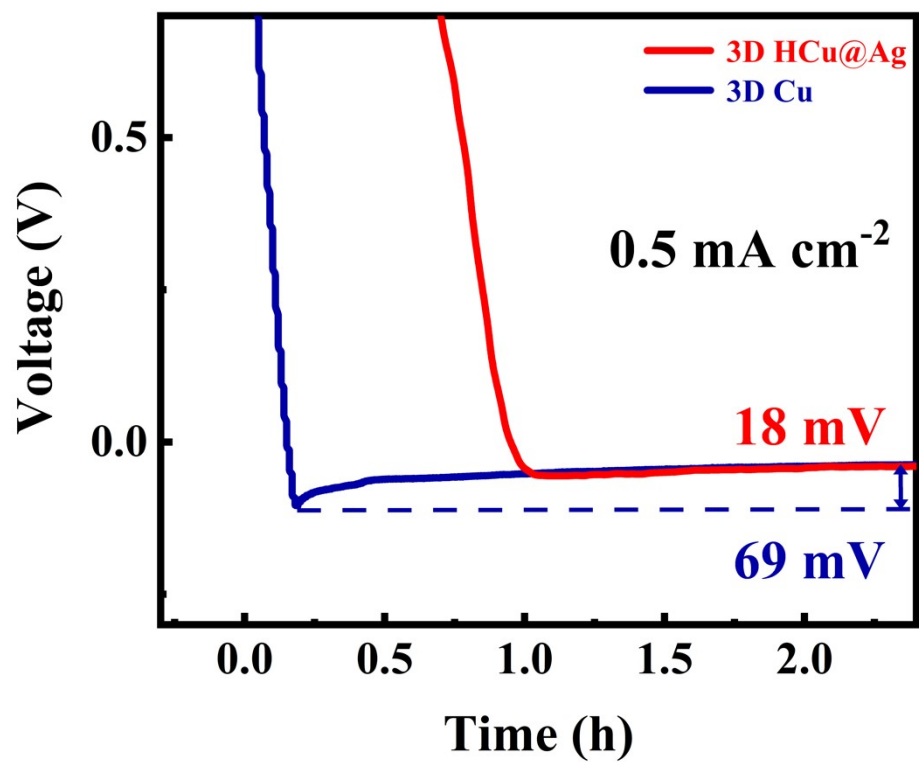

**Figure S3.** Time-voltage profiles of lithium deposited on the 3D HCu@Ag and 3D Cu at a current density of 0.5 mA cm<sup>-2</sup>.

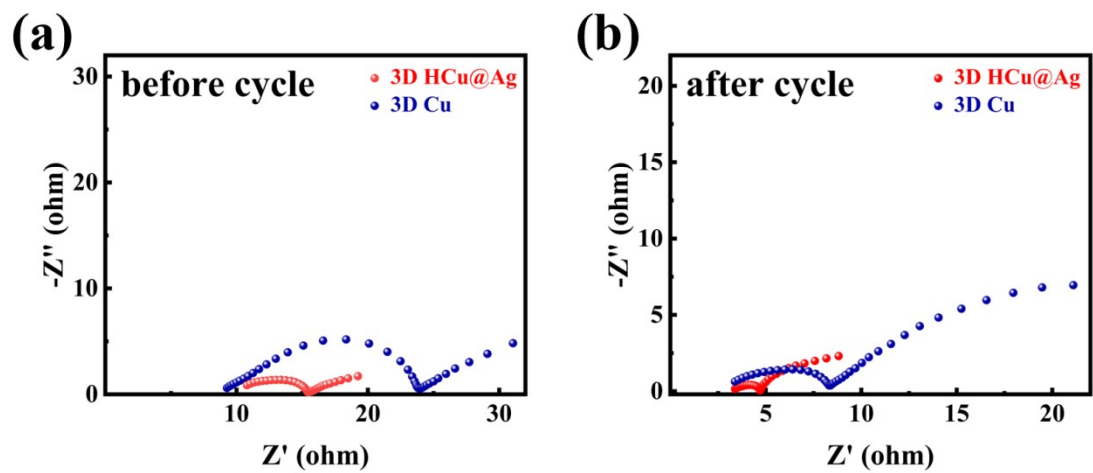

**Figure S4** Nyquist plots of the 3D HCu@Ag and 3D Cu symmetrical cells (a) before the cycle and (b) after 50th cycle.

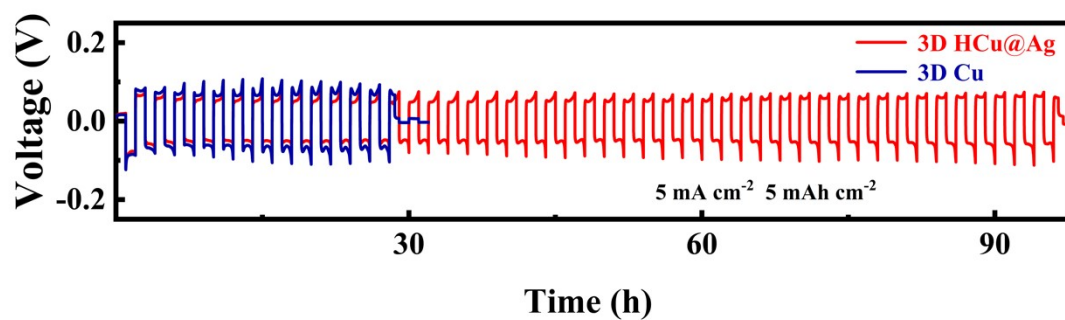

**Figure S5.** Galvanostatic discharge/charge profiles of the Li-3D HCu@Ag and Li-3D Cu symmetrical cells at  $5 \text{ mA cm}^{-2}$  with  $5 \text{ mA h cm}^{-2}$

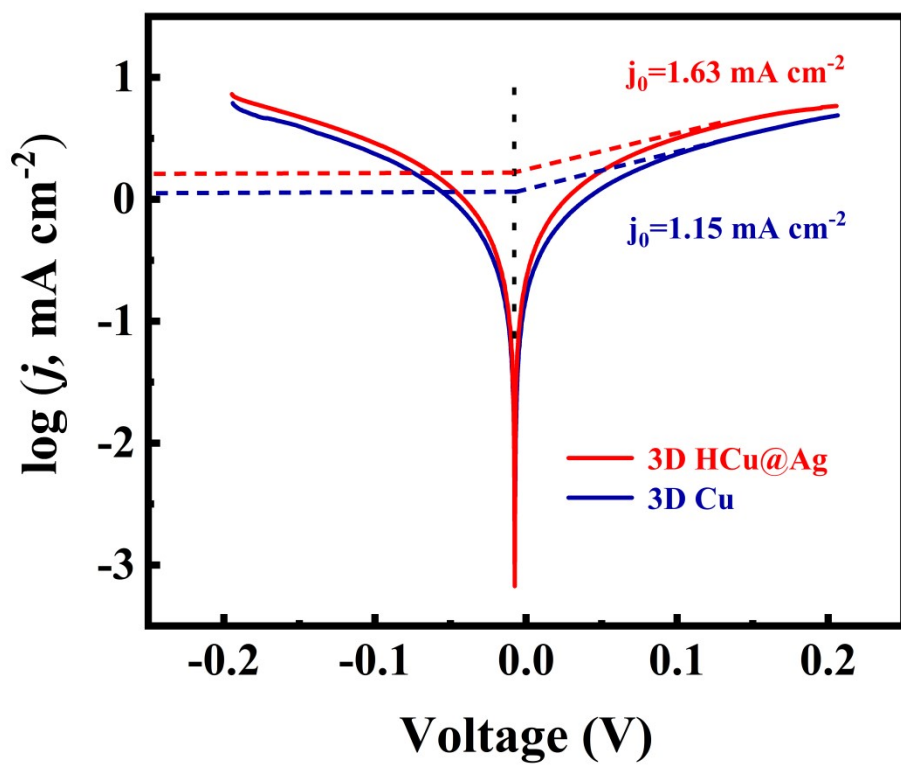

Figure S6. Exchange current density of 3D HCu@Ag and 3D Cu.

**Table S1** Comparison of the cycling performance of half-cell between the Li-3D HCu@Ag and reported lithiophilic Cu-based current collectors.

| Current Collector  | Lithiophilic modifiers | Current density (mA cm <sup>-2</sup> ) | Areal capacity (mAh cm <sup>-2</sup> ) | cycles | Ref.      |
|--------------------|------------------------|----------------------------------------|----------------------------------------|--------|-----------|
| 2h-3D CuZn         | CuZn alloy             | 0.5                                    | 1                                      | 220    | 1         |
|                    |                        | 1                                      | 1                                      | 150    |           |
| Li-Cu/CF           | Li-Cu alloy            | 1                                      | 1                                      | 210    | 2         |
| Cu@Ag foam         | Ag                     | 0.5                                    | 2                                      | 70     | 3         |
| Au/Cu nanoscaffold | Au nanoseed            | 0.5                                    | 1                                      | 200    | 4         |
| PDA@3D Cu          | polydopamine           | 0.5                                    | 1                                      | 200    | 5         |
|                    |                        | 1                                      | 1                                      | 150    |           |
|                    |                        | 2                                      | 1                                      | 150    |           |
| h-BN@Cu            | h-BN                   | 0.5                                    | 1                                      | 240    | 6         |
| 3D HCu@Ag          | Ag                     | 1                                      | 1                                      | 170    | This work |
|                    |                        | 3                                      | 1                                      | 70     |           |

**Table S2** Comparison of the cycling performance of symmetrical cell between the Li-3D HCu@Ag and reported lithiophilic Cu-based current collectors.

| Current Collector | Lithiophilic modifiers                           | Current density (mA cm <sup>-2</sup> ) | Areal capacity (mAh cm <sup>-2</sup> ) | Time (h) | Ref. |
|-------------------|--------------------------------------------------|----------------------------------------|----------------------------------------|----------|------|
| LVCF              | ZnO quantum dots, N-containing functional groups | 0.5                                    | 1                                      | 1800     | 7    |
|                   |                                                  | 5                                      | 1                                      | 500      |      |
|                   |                                                  | 3                                      | 3                                      | 550      |      |
| CoO-CF            | CoO nanosheets                                   | 1                                      | 1                                      | 600      | 8    |
|                   |                                                  | 8                                      | 1                                      | 150      |      |
| TiN@Cu foam       | TiN                                              | 0.5                                    | 1                                      | 1900     | 9    |
|                   |                                                  | 1                                      | 1                                      | 1000     |      |
|                   |                                                  | 3                                      | 1                                      | 200      |      |
| ZnO-MCNCF         | ZnO layer                                        | 1                                      | 1                                      | 900      | 10   |
|                   |                                                  | 3                                      | 1                                      | 300      |      |
| Li/Ag@Cu          | Ag                                               | 1                                      | 1                                      | 1000     | 11   |



|             |                  |     |   |      |           |
|-------------|------------------|-----|---|------|-----------|
|             |                  | 3   | 1 | 600  |           |
|             |                  | 5   | 1 | 600  |           |
|             |                  | 3   | 3 | 400  |           |
| BP@Cu foams | Black Phosphorus | 0.5 | 1 | 1300 | 12        |
|             |                  | 1   | 1 | 900  |           |
| CAI         | Ag               | 5   | 1 | 60   | 13        |
| 3D HCu@Ag   | Ag               | 1   | 1 | 1500 | This work |
|             |                  | 3   | 3 | 350  |           |
|             |                  | 5   | 5 | 100  |           |

### References:

1. D. Zhang, A. Dai, M. Wu, K. Shen, T. Xiao, G. Hou, J. Lu and Y. Tang, *ACS Energy Lett.*, 2020, **5**, 180–186.
2. Z. Lu, Z. Tai, Z. Yu, A. P. LaGrow, O. Bondarchuk, J. P.S. Sousa, L. Meng, Z. Peng and L. Liu, *Mater. Today Energy*, 2021, **22**, 100871.
3. Z. Zhu, Z. Wang, S. Liu, G. Li and X. Gao, *Electrochim. Acta*, 2021, **379**, 138152.
4. H. Lin, Z. Zhang, Y. Wang, X. Zhang, Z. Tie, and Z. Jin, *Adv. Funct. Mater.*, 2021, **31**, 2102735.
5. J. Jiang, Z. Pan, Z. Kou, P. Nie, C. Chen, Z. Li, S. Li, Q. Zhu, H. Dou, X. Zhang, and J. Wang, *Energy Storage Mater.*, 2020, **29**, 84–91.
6. X. Liu, Z. Liu, H. Yang, P. Qing, W. Wei, X. Ji, Y. Chen, and L. Chen, *Adv. Mater. Interfaces*, 2022, **9**, 2200011.
7. T. Liu, S. Chen, W. Sun, L. Lv, F. Du, H. Liu and Y. Wang, *Adv. Funct. Mater.*, 2021, **34**, 2008514.
8. R. Zhang, Y. Li, M. Wang, D. Li, J. Zhou, L. Xie, T. Wang, W. Tian, Y. Zhai, H. Gong, M. Gao, K. Liang, P. Chen and B. Kong, *Small*, 2021, **17**, 2101301.
9. Y. Wang, W. Zhang, Y. Qi, S. Wang, P. Liu, X. Wei, Y. Yu, W. Sun, X. Zhao and Y. Liu, *J. Alloys Compd.*, 2021, **874**, 159916.
10. R. Zhang, Y. Li, L. Qiao, D. Li, J. Deng, J. Zhou, L. Xie, Y. Hou, T. Wang, W. Tian, J. Cao, F. Cheng, B. Yang, K. Liang, P. Chen, and B. Kong, *Energy Storage Mater.*, 2021, **37**, 123–134.
11. L. Wu, W. Jiang, H. Zou, C. Ye, J. Zhang, G. Xu, X. Li, Z. Yue, F. Sun and L. Zhou, *J. Mater. Chem. A*, 2021, **9**, 20748–20757.
12. Y. Wang, H. Sang, W. Zhang, Y. Qi, R. He, B. Chen, W. Sun, X. Zhao, D. Fu and Y. Liu, *ACS Appl. Mater. Interfaces*, 2020, **12**, 51563–51572.
13. Y. Liu, S. Huang, Q. Meng, Y. Fan, B. Wang, Y. Yang, G. Cao and H. Zhang, *J. Alloys Compd.*, 2021, **885**, 160882.
